# Supplementary material for: T-cell repertoires in refractory coeliac disease
Source: PubMed Central journal article supplement — Gut. 2017 Feb 10;67(4):644–53. doi: 10.1136/gutjnl-2016-311816 (PMC5868243; doi:10.1136/gutjnl-2016-311816), 2017-02-10
Supplement: gutjnl-2016-311816supp002.pdf [file gutjnl-2016-311816supp002.pdf]

# GeneScan results of TCR beta ( $\beta$ ) analyses

ACD

## Patient #1



## Patient #2



## Patient #3



Red = Size marker

Blue/Green = Product peaks

TCRβ A/B = Set of PCR primers (BIOMED-2)

**Patient #4**



**Patient #5**



**Patient #6**



# ACD

## Patient #7



## Patient #8



## Patient #9



# ACD

## Patient #10



# CD GFD

## Patient #11



## Patient #12



# CD GFD

## Patient #13



## Patient #14



## Patient #15



# CD GFD

## Patient #16



## Patient #17



## Patient #18



**CD GFD**

**Patient #19**



**Control**

**Patient #20**



**Patient #21**



**Control**

**Patient #22**



**Patient #23**



**Patient #24**



**Control**

**Patient #25**



**Patient #26**



**Patient #27**



**Control**

**Patient #28**



**RCD I**

**Patient #29**



**Patient #30**



# RCD I

## Patient #31



## Patient #32



## Patient #33



# RCD I

## Patient #34



## Patient #35



## Patient #36



# RCD II

## Patient #37



## Patient #38



## Patient #39



# RCD II

## Patient #40



## Patient #41



## Patient #42



# RCD II

## Patient #43



## Patient #44



# Marsh I

## Patient #45



Patient #46



Patient #47



# GeneScan results of TCR gamma ( $\gamma$ ) and beta ( $\beta$ ) analyses

Patient #23



# GeneScan results of TCR gamma ( $\gamma$ ) and beta ( $\beta$ ) analyses

Patient #25



# GeneScan results of TCR gamma ( $\gamma$ ) and beta ( $\beta$ ) analyses

Patient #36
